# Supplementary material
Source: Springer Nature journal article supplement (https://www.springermedizin.de/resource/supplementary/12963_2010_107_MOESM6_ESM.pdf/9572674)

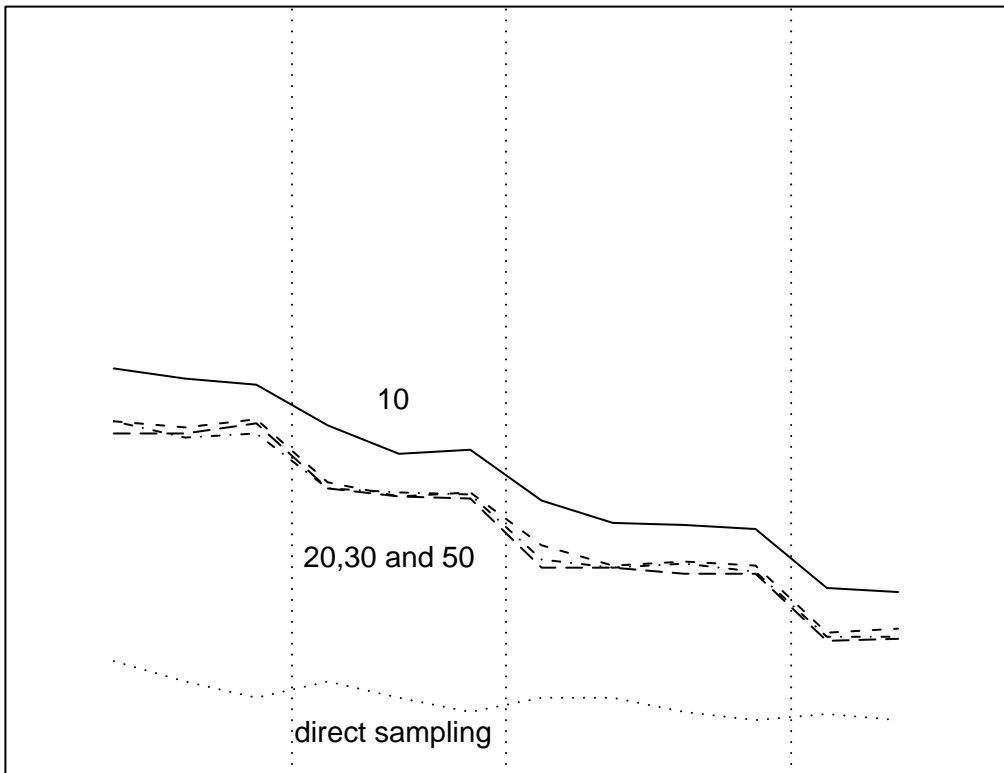

2000                      3000                      5000                      10000

3000-10000    3000-10000                      5000-30000                      20000-30000

Supplement: MOESM6 [file 9572674]
